# Supplementary material
Source: MDPI journal article supplement (https://www.mdpi.com/2073-4441/15/23/4062)
Supplement: s1 [file s1]

# **Continuous hydrogen production via hydrothermal gasification of biodiesel industry wastewater: experimental optimization and energy integration simulation**

Isabela R. Teixeira <sup>1</sup>, Isabela M. Dias <sup>1</sup>, Lucas C. Mourão <sup>1</sup>, Laiane A. Andrade <sup>2</sup>, Leandro V. Pavão <sup>3</sup>, J. M. Abelleira-Pereira <sup>5</sup>, Guilherme B. M. Souza <sup>1</sup>, Lucio Cardozo-Filho <sup>3</sup>, Christian G. Alonso <sup>1</sup>, Reginaldo Guirardello <sup>4,\*</sup>

<sup>1</sup> Universidade Federal de Goiás (UFG), Instituto de Química, Av. Esperança s/n, Campus Samambaia, CEP 74690-900, Goiânia, Goiás, Brazil.

<sup>2</sup> Universidade Federal do Mato Grosso do Sul (UFMS), Av. Rosilene Lima Oliveira, 64, Jardim Universitário, CEP 79750-000, Nova Andradina, Mato Grosso do Sul, Brazil.

<sup>3</sup> Programa de Pós-Graduação em Engenharia Química, Universidade Estadual de Maringá (UEM), Avenida Colombo, 5790 - Zona 7, Maringá - PR, 87020-900, Brazil.

<sup>4</sup> School of Chemical Engineering, University of Campinas (UNICAMP), Av. Albert Einstein 500, 13083-852, Campinas, SP, Brazil

<sup>5</sup> Department of Chemical Engineering and Food Technology, Faculty of Sciences, University of Cádiz, International Excellence Agrifood Campus (CeIA3), 11510, Puerto Real (Cádiz), Spain.

\* Correspondence: [guira@feq.unicamp.br](mailto:guira@feq.unicamp.br)

**Table S1** Effect estimates in SCWG for hydrogen production.

| Factor                 | Effect   | Std. Err.<br>Pure Err | -95%<br>Cnf.<br>Limt | +95%<br>Cnf.<br>Limt | t(3)     | p        | Coeff.   | Std.<br>Err.<br>Coeff. | -95%<br>Cnf.<br>Limt | +95%<br>Cnf.<br>Limt |
|------------------------|----------|-----------------------|----------------------|----------------------|----------|----------|----------|------------------------|----------------------|----------------------|
| Mean/Interc.           | 1023.611 | 4153.420              | 869.776              | 1177.447             | 21.17578 | 0.000230 | 1023.611 | 48.3387                | 869.776              | 1177.447             |
| Feed flow rate (L)     | 282.355  | 106.861               | 1.925                | 562.785              | 3.20429  | 0.049170 | 141.177  | 44.0588                | 0.962                | 281.392              |
| Temperature (L)        | 2717.684 | 12.798                | 2436.555             | 2998.814             | 30.76481 | 0.000075 | 1358.842 | 44.1687                | 1218.278             | 1499.407             |
| Temperature (Q)        | 1154.088 | 0.010                 | 844.769              | 1463.406             | 11.87391 | 0.001284 | 577.044  | 48.5976                | 422.385              | 731.703              |
| Two-way<br>interaction | 763.270  | 0.177                 | 366.573              | 1159.968             | 6.12322  | 0.008756 | 381.635  | 62.3258                | 183.286              | 579.984              |

R-sqr = 0.99283; Adj = 0.98873; 2 factors, 1 blocks, 12 runs, MS Pure Error = 15540.81

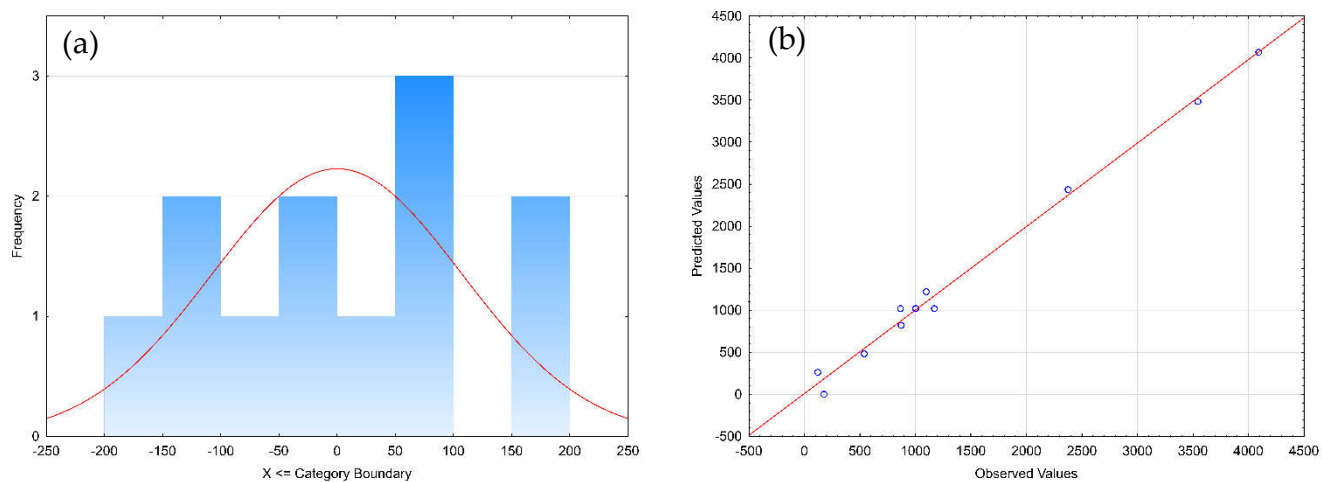

**Figure S1** (a) Distribution of residual; (b) Residuals x predicted values.

**Table S2** Removal of total organic carbon after SCWG process

| Run | Feed flow rate (mL/min) | Temperature (°C) | TOC (%) |
|-----|-------------------------|------------------|---------|
| 1   | 12.3                    | 529              | 18.99   |
| 2   | 12.3                    | 671              | 82.62   |
| 3   | 22.9                    | 529              | 8.31    |
| 4   | 22.9                    | 671              | 57.27   |
| 5   | 10                      | 600              | 48.09   |
| 6   | 25                      | 600              | 19.11   |
| 7   | 17.5                    | 500              | 4.48    |
| 8   | 17.5                    | 700              | 74.07   |
| 9   | 17.5                    | 600              | 27.86   |
| 10  | 17.5                    | 600              | 23.95   |
| 11  | 17.5                    | 600              | 25.54   |
| 12  | 17.5                    | 600              | 27.00   |

**Table S3** Effects estimate in SCWG for removal of total organic carbon.

| Factor              | Effect  | Std. Err.<br>Pure Err | -93%<br>Cnf. Limt | +93%<br>Cnf. Limt | t(2)    | p      | Coeff. | Std.<br>Err.<br>Coeff. | -93%<br>Cnf.<br>Limt | +93%<br>Cnf.<br>Limt |
|---------------------|---------|-----------------------|-------------------|-------------------|---------|--------|--------|------------------------|----------------------|----------------------|
| Mean/Interc.        | 25.576  | 1.135                 | 21.514            | 29.638            | 22.530  | 0.0019 | 25.576 | 1.135                  | 21.514               | 29.638               |
| Feed flow rate (L)  | -18.996 | 1.390                 | -23.970           | -14.022           | -13.665 | 0.0053 | -9.498 | 0.695                  | -11.985              | -7.011               |
| Feed flow rate (Q)  | 10.576  | 1.651                 | 4.664             | 16.487            | 6.402   | 0.0235 | 5.288  | 0.825                  | 2.332                | 8.243                |
| Temperature (L)     | 52.797  | 1.393                 | 47.811            | 57.783            | 37.892  | 0.0006 | 26.398 | 0.696                  | 23.906               | 28.891               |
| Temperature (Q)     | 16.404  | 1.665                 | 10.445            | 22.362            | 9.851   | 0.0101 | 8.202  | 0.832                  | 5.222                | 11.181               |
| Two-way interaction | -7.269  | 1.966                 | -14.304           | -0.233            | -3.697  | 0.0660 | -3.634 | 0.983                  | -7.152               | -0.116               |

R-sqr = 0.98625; Adj = 0.9725; 2 factors, 1 blocks, 11 runs, MS Pure Error = 3.8664

**Table S4** Regression coefficients in SCWG for removal of total organic carbon.

| Factor              | Regressn<br>Coeff. | Std. Err.<br>Pure Err | t(2)    | p      | -93%<br>Cnf. Limt | +93%<br>Cnf. Limt |
|---------------------|--------------------|-----------------------|---------|--------|-------------------|-------------------|
| Mean/Interc.        | 376.0893           | 68.0067               | 5.5301  | 0.0311 | 132.7443          | 619.4343          |
| Feed flow rate (L)  | -2.6235            | 1.8816                | -1.3942 | 0.2979 | -9.3565           | 44.1094           |
| Feed flow rate (Q)  | 0.1883             | 0.0294                | 6.4021  | 0.0235 | 0.0830            | 0.2935            |
| Temperature (L)     | -1.4107            | 0.2036                | -6.9263 | 0.0202 | -2.1394           | -0.6819           |
| Temperature (Q)     | 0.0016             | 0.0001                | 9.8512  | 0.0101 | 0.0010            | 0.0022            |
| Two-way interaction | -0.0097            | 0.0026                | -3.6970 | 0.0660 | -0.0190           | -0.0003           |

R-sqr = 0.98625; Adj = 0.9725; 2 factors, 1 blocks, 11 runs, MS Pure Error = 3.8664

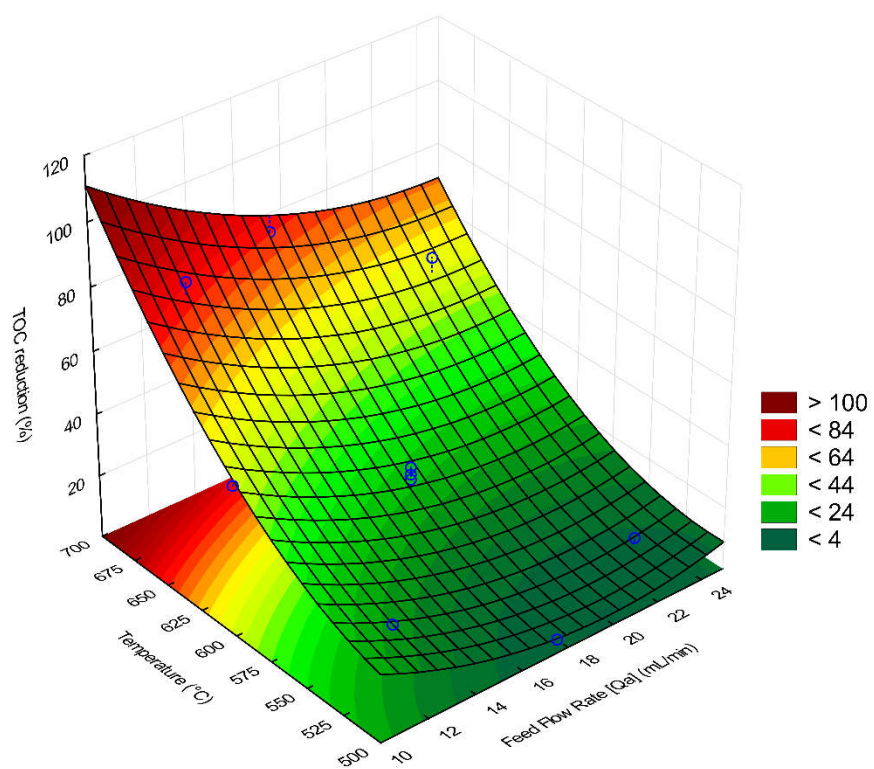

**Figure S1** Response surface of TOC removal as a function of temperature and feed flow rate.

**Table S5** ANOVA table in SCWG for removal of total organic carbon.

| Factor              | Df | Sum Sq   | Mean Sq  | F-value  | p-value  |
|---------------------|----|----------|----------|----------|----------|
| Feed flow rate (L)  | 1  | 722.028  | 722.028  | 186.743  | 0.005312 |
| Feed flow rate (Q)  | 1  | 158.4733 | 158.473  | 40.986   | 0.023540 |
| Temperature (L)     | 1  | 5551.549 | 5551.549 | 1435.832 | 0.000696 |
| Temperature (Q)     |    | 375.223  | 375.223  | 97.046   | 0.010148 |
| Two-way interaction | 1  | 52.848   | 52.848   | 13.668   | 0.066001 |
| Lack-of-fit         | 3  | 86.791   | 28.930   | 7.482    | 0.120168 |
| Pure Error          | 2  | 7.733    | 3.866    |          |          |
| Total SS            | 10 | 6874.099 |          |          |          |

R-sqr = 0.98625; Adj = 0.9725; 2 factors, 1 blocks, 11 runs, MS Pure Error = 3.8664

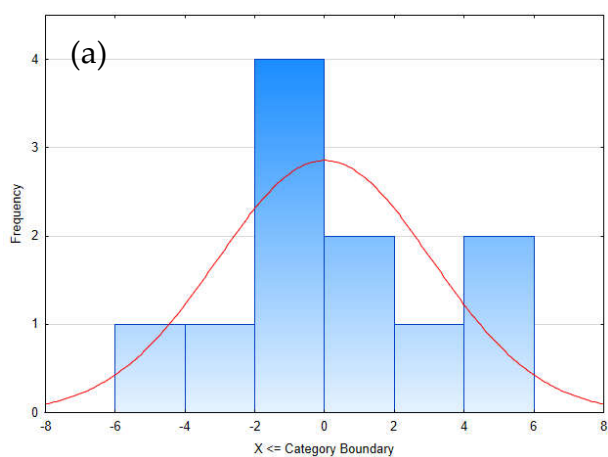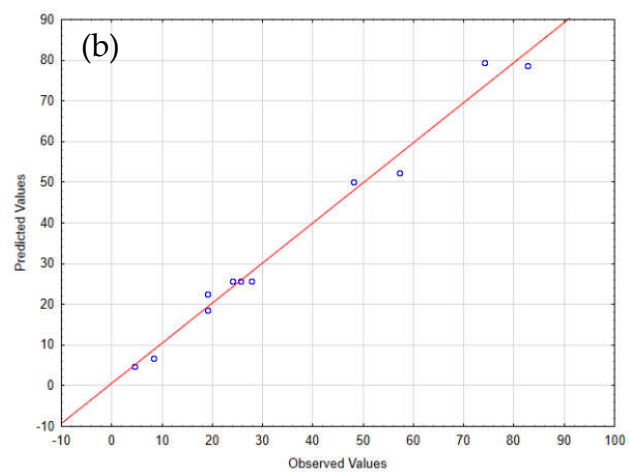

**Figure S3** (a) Distribution of residual; (b) Residuals x predicted values.

**Table S6** Chemical composition of Inconel 625

| <b>Chemical</b> | <b>Concentration (%)</b> |
|-----------------|--------------------------|
| Nickel (Ni)     | 58 - 71%                 |
| Chromium (Cr)   | 21 - 23%                 |
| Molybdenum (Mo) | 8 - 10%                  |
| Iron (Fe)       | 5%                       |
| Niobium (Nb)    | 3.2 – 3.8%               |
| Tantalum (Ta)   | 3.2 – 3.8%               |
| Cobalt (Co)     | 1% max.                  |
| Manganese (Mn)  | 0.5 % max.               |
| Aluminum (Al)   | 0.4% max.                |
